# Supplementary material
Source: Springer Nature journal article supplement (https://www.springermedizin.de/resource/supplementary/12885_2008_1619_MOESM4_ESM.pdf/9472482)

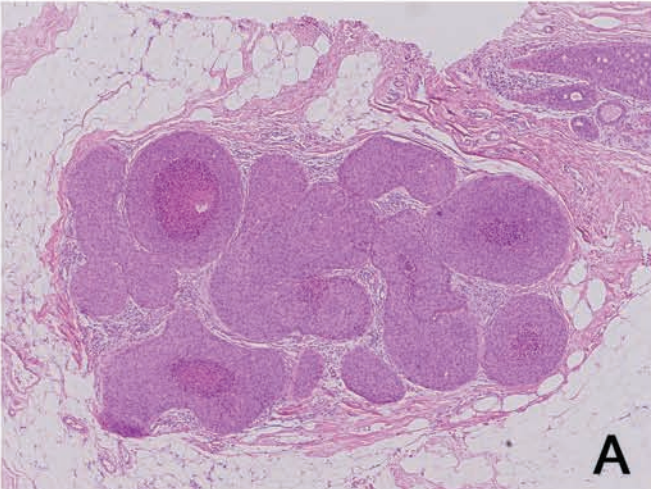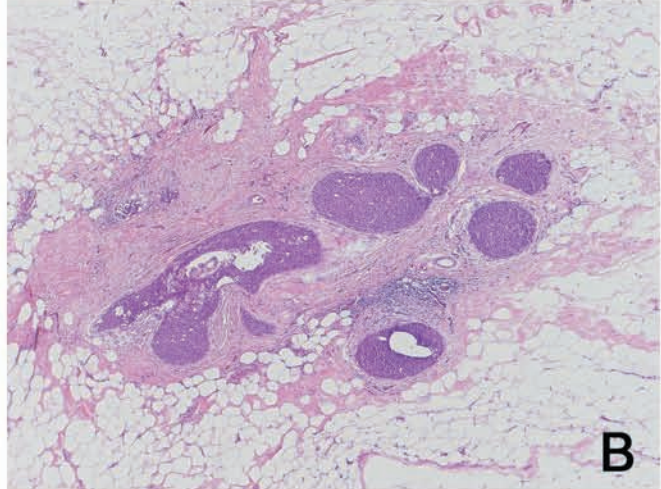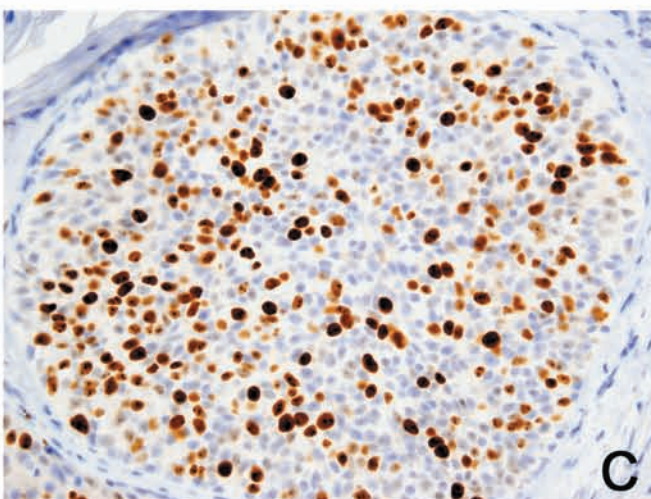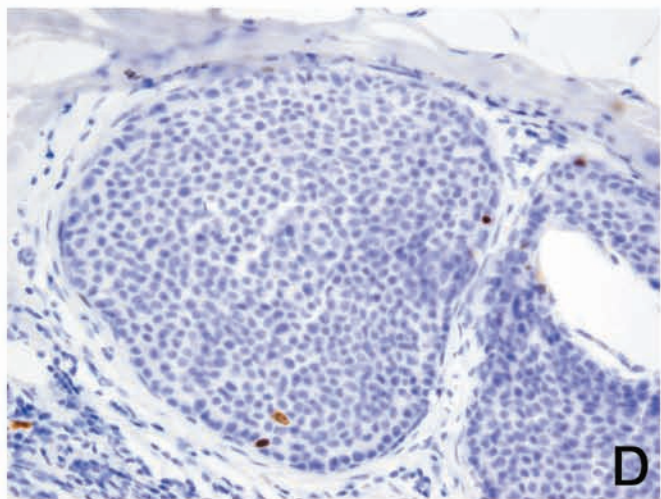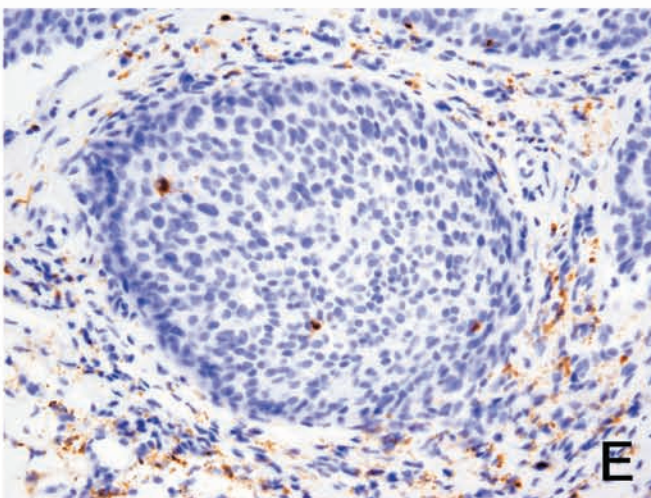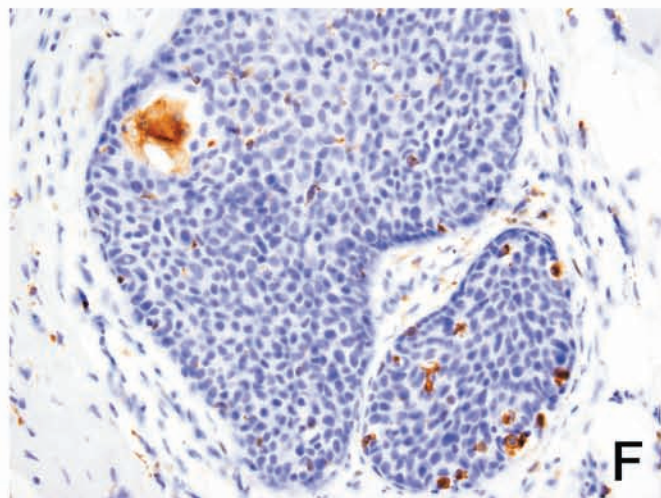

Supplement: MOESM4 [file 9472482]
